# Supplementary material for: Phosphatidylcholine Liposomes Reprogram Macrophages toward an Inflammatory Phenotype
Source: MDPI journal article supplement (doi:10.3390/membranes13020141), 2023-01-21
Supplement: s1 [file s1]

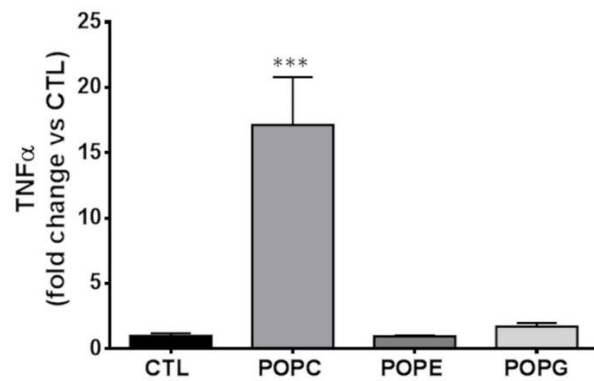

**Figure S1. Effect of POPC, POPE, and POPG liposomes on TNF- $\alpha$  expression.** POPC, POPE, and POPG liposomes were prepared as described in the Materials and Methods section. However, POPE liposome preparation was performed at 30°C, above the phase transition temperature of 1-palmitoyl-2-oleoyl-*sn*-glycero-3-phosphoethanolamine (POPE). J774A.1 cells were treated with POPC, POPE, or POPG liposomes ( $2 \times 10^5$  liposomes/cell) for 2 hours, and TNF- $\alpha$  mRNA levels were analyzed by qPCR. The housekeeping gene GAPDH was used to normalize data to cDNA inputs. Results ( $n=3$ ) are expressed as fold change versus CTL, and statistical analysis was performed using one-way ANOVA ( $p < 0.001$ ) followed by Tukey's Multiple Comparison Test with \*\*\* indicating  $p < 0.001$  compared to controls.
