# Supplementary material for: Phosphatidylcholine Liposomes Reprogram Macrophages toward an Inflammatory Phenotype
Source: Membranes (Basel). 2023 Jan 21;13(2):141. doi: 10.3390/membranes13020141 (PMC9968183; doi:10.3390/membranes13020141)
Supplement: Supplementary file 1 [file membranes-13-00141-s001.zip › Cauvi et al. Membranes Table S1_Supp Info.xlsx]

## Sheet: TABLE S1
	Table S1
	Genes only up-regulated by POPC (n=146)
	Symbol	logFC	Fold change	adj.P.Val
	Mfsd2a	5.62442	49.3307	0.0133919
	Tril	5.29153	39.1661	0.0361595
	Tnfsf4	3.61463	12.2493	0.00728052
	Orm3	3.52845	11.539	0.0160606
	Rhou	3.39678	10.5325	0.00640926
	Il2ra	2.65094	6.28076	0.0133919
	Tead3	2.40721	5.30448	0.0154196
	Dhrs13	2.36966	5.16821	0.0145304
	Cp	2.04117	4.1158	0.020181
	Fam83g	2.04084	4.11485	0.0280884
	Il4ra	2.03255	4.09128	0.0133577
	Hs3st3b1	2.00266	4.00738	0.0211059
	Acat3	1.78556	3.44751	0.0186693
	Trmt61a	1.77433	3.4208	0.0150421
	Aen	1.74228	3.34564	0.0136037
	Fcrl5	1.72858	3.31401	0.0180617
	Zc3h12d	1.69676	3.24172	0.0205484
	Ctps	1.68431	3.21386	0.0138615
	Ppan	1.62674	3.08815	0.0269867
	Lrrc25	1.59408	3.01903	0.01686
	Orm1	1.56181	2.95225	0.0264104
	Grwd1	1.55434	2.93698	0.0241612
	Clec2d	1.52329	2.87447	0.00901049
	Sh3gl1	1.50371	2.8357	0.0174539
	Myc	1.49979	2.82801	0.0133919
	Traf4	1.49765	2.82383	0.00769827
	Rrp9	1.4924	2.81357	0.0186693
	Nop2	1.43909	2.7115	0.022132
	Nle1	1.43871	2.71078	0.0288467
	Nhlrc1	1.43495	2.70373	0.0341887
	Mphosph10	1.41325	2.66337	0.0143076
	Crip2	1.40069	2.64029	0.0349332
	Amigo2	1.3974	2.63427	0.0186693
	Tsr1	1.38254	2.60727	0.0240883
	Tha1	1.37119	2.58684	0.0326223
	Nop56	1.34263	2.53614	0.0192129
	Rpl10a	1.30817	2.47628	0.0180617
	Zfp97	1.3	2.46229	0.0405747
	Polr1b	1.24772	2.37467	0.0193348
	Zmynd19	1.236	2.35545	0.00629849
	2410002F23Rik	1.23129	2.34777	0.0137437
	Pwp2	1.22777	2.34205	0.0186693
	Alkbh1	1.2212	2.33141	0.0133919
	Bcar3	1.20861	2.31114	0.0136037
	Nifk	1.17281	2.25451	0.0395796
	Rrp1b	1.16984	2.24987	0.0294046
	Prmt6	1.14647	2.21372	0.0125724
	Qtrt2	1.14577	2.21264	0.0178056
	Trim30a	1.14211	2.20704	0.0288467
	Chchd4	1.13839	2.20136	0.0246059
	Mak16	1.13591	2.19758	0.033063
	Ftsj3	1.1353	2.19664	0.0418397
	Kbtbd8	1.11157	2.1608	0.016094
	Irgm2	1.10488	2.15081	0.0335358
	Nip7	1.10423	2.14984	0.0355954
	Noc3l	1.10273	2.14761	0.0264104
	Bysl	1.10113	2.14523	0.0186693
	Wdr75	1.09233	2.13218	0.0295425
	Kti12	1.07575	2.10782	0.033063
	Nob1	1.04362	2.0614	0.0174539
	Dph2	1.02037	2.02845	0.0288467
	Gmppb	1.00282	2.00391	0.0159356
	Ppid	1.00125	2.00173	0.0213506
	Noc4l	0.994921	1.99297	0.0307083
	Mrm3	0.985237	1.97964	0.0370834
	Rhbdf1	0.98131	1.97426	0.0107821
	Gpatch4	0.974521	1.96499	0.0414675
	Pus7	0.970148	1.95904	0.015716
	Rsl1d1	0.969183	1.95773	0.0331868
	Cct3	0.953873	1.93707	0.0198728
	Denr	0.948695	1.93013	0.0341887
	Irf9	0.946137	1.92671	0.0155386
	Utp23	0.944688	1.92477	0.0186693
	Nop16	0.94359	1.92331	0.0307083
	Dimt1	0.940653	1.9194	0.0318922
	Dis3	0.936985	1.91452	0.0371845
	Rapgef3	0.935393	1.91241	0.0460178
	Rnf31	0.924688	1.89827	0.0142317
	Pcgf6	0.920928	1.89333	0.0373006
	Ndufaf4	0.91683	1.88796	0.0234916
	Esf1	0.912553	1.88237	0.0355981
	Rmdn3	0.901535	1.86805	0.0381582
	Bst2	0.899649	1.86561	0.0186693
	Clp1	0.896983	1.86217	0.0221128
	Atad3a	0.890097	1.8533	0.0334466
	B4galt3	0.883759	1.84518	0.0161456
	Abhd17b	0.874637	1.83355	0.0187906
	Trmt10c	0.860647	1.81585	0.0288467
	Parp9	0.843857	1.79484	0.0211059
	Lsg1	0.836823	1.78611	0.0274065
	Yars2	0.832733	1.78106	0.0347231
	Pik3cd	0.828445	1.77577	0.0425499
	Cox11	0.828394	1.77571	0.0371845
	Twsg1	0.827934	1.77514	0.01398
	Rsc1a1	0.827546	1.77466	0.0137437
	Umps	0.821452	1.76718	0.0265374
	C1qbp	0.817382	1.76221	0.0278559
	Nol11	0.816675	1.76134	0.0378116
	Mrps2	0.811071	1.75451	0.0420676
	Adamts6	0.806299	1.74872	0.0306137
	Isyna1	0.805758	1.74806	0.0450723
	Hgh1	0.791295	1.73063	0.0479203
	Farsa	0.789884	1.72894	0.0496559
	Mrps7	0.783959	1.72185	0.025138
	Gimap3	0.782571	1.72019	0.0301234
	Tcp1	0.782192	1.71974	0.0284104
	Mettl2	0.779041	1.71599	0.0409651
	Pa2g4	0.769269	1.70441	0.0390015
	Nxt1	0.754946	1.68757	0.0437916
	Mis12	0.745331	1.67636	0.0180132
	Eif1ad	0.741822	1.67229	0.0281638
	Cacybp	0.74056	1.67082	0.0377372
	Slc25a19	0.735103	1.66452	0.0181219
	Arpin	0.730181	1.65885	0.0403034
	Dusp12	0.720928	1.64824	0.0314666
	Tut1	0.716508	1.6432	0.042599
	Krr1	0.714023	1.64037	0.0318922
	Rps19bp1	0.713906	1.64024	0.0445202
	D11Wsu47e	0.713553	1.63984	0.0234063
	Srsf1	0.698922	1.62329	0.0347231
	Ddx18	0.688962	1.61212	0.040041
	Ptges2	0.68707	1.61001	0.0325404
	Med19	0.682338	1.60474	0.0220932
	Trim27	0.655159	1.57479	0.0287026
	Srp19	0.654071	1.5736	0.026982
	Ppif	0.647093	1.56601	0.0442183
	Rnf114	0.643841	1.56248	0.0320738
	Rrp7a	0.637183	1.55529	0.0371845
	Mrpl17	0.628299	1.54574	0.0463069
	Pigm	0.625064	1.54228	0.0315647
	Lrrc47	0.609987	1.52625	0.0341887
	Rexo4	0.594391	1.50983	0.0361595
	Wdr77	0.591878	1.50721	0.0441863
	Ahsa1	0.591614	1.50693	0.0340817
	Tada1	0.576233	1.49095	0.0211059
	Sumo1	0.574544	1.48921	0.0484915
	Prpf4	0.573566	1.4882	0.0377125
	Sart3	0.55076	1.46486	0.0294046
	Ap1ar	0.548059	1.46212	0.0468228
	Cog8	0.545207	1.45923	0.033063
	Srsf10	0.521057	1.43501	0.0478153
	Zfp574	0.50935	1.42341	0.0256998
	4930453N24Rik	0.49768	1.41194	0.0287026
	Panx1	0.493531	1.40789	0.0477453
	Ints5	0.490733	1.40516	0.0450891
	Cdc25a	0.489764	1.40421	0.0443437
