# Supplementary material for: Phosphatidylcholine Liposomes Reprogram Macrophages toward an Inflammatory Phenotype
Source: Membranes (Basel). 2023 Jan 21;13(2):141. doi: 10.3390/membranes13020141 (PMC9968183; doi:10.3390/membranes13020141)
Supplement: Supplementary file 1 [file membranes-13-00141-s001.zip › Cauvi et al. Membranes Table S2_Supp Info.xlsx]

## Sheet: TABLE S2
	Table S2
	Genes only down-regulated by POPC (n=69)
	Symbol	logFC	Fold change	adj.P.Val
	Epha2	-3.47997	11.1577	0.0492254
	Tmem86a	-2.9557	7.75811	0.0100033
	Cln8	-2.71471	6.56462	0.00674052
	Gata6	-2.6929	6.46612	0.00640926
	Zfp36l2	-2.50386	5.67201	0.0101179
	Mdm1	-1.9388	3.83388	0.0313347
	Fgd4	-1.87385	3.6651	0.0264104
	Snx24	-1.81787	3.5256	0.021328
	Klf9	-1.74794	3.3588	0.0287026
	Tiam2	-1.6907	3.22813	0.0319298
	Tmem104	-1.67887	3.20177	0.0341541
	Frmd4a	-1.64834	3.13472	0.0281735
	Itpripl2	-1.60739	3.04699	0.0194335
	Nlrp1b	-1.4944	2.81747	0.0241341
	Hs1bp3	-1.48633	2.80175	0.0186693
	Rasgrp3	-1.48204	2.79343	0.0288467
	Lrp4	-1.47736	2.78439	0.0147401
	Rab7b	-1.41227	2.66155	0.0377323
	Slc8b1	-1.41055	2.65838	0.0211059
	Baiap2	-1.37326	2.59054	0.0298914
	Tmem170b	-1.29902	2.46061	0.0229677
	Tbcel	-1.295	2.45376	0.0307083
	Dab2ip	-1.28719	2.44053	0.0341887
	Cped1	-1.2831	2.43362	0.0292828
	Gpsm2	-1.27917	2.427	0.0186693
	Sik1	-1.26663	2.40599	0.0150222
	Ticam2	-1.18678	2.27644	0.0329126
	Dennd2a	-1.1843	2.27254	0.0145304
	Adrb2	-1.13734	2.19975	0.00232061
	Nphp3	-1.13333	2.19364	0.0137014
	Fam84b	-1.12962	2.188	0.0240883
	Foxo3	-1.12177	2.17614	0.0378763
	Tbc1d31	-1.11625	2.16783	0.048839
	Tmem189	-1.10832	2.15595	0.033063
	6430548M08Rik	-1.08459	2.12078	0.0338224
	Sema4b	-1.05783	2.0818	0.0277398
	Elmo2	-1.03471	2.0487	0.0310139
	Klhl21	-1.02221	2.03103	0.0460264
	Tlr13	-1.00891	2.01239	0.0365812
	Etv1	-1.00388	2.00539	0.011685
	Tob1	-0.995981	1.99444	0.0357529
	Hbp1	-0.989677	1.98574	0.0133577
	Slc35e3	-0.9822	1.97548	0.0274065
	Inpp1	-0.973175	1.96316	0.0240238
	C3ar1	-0.971323	1.96064	0.0287818
	Slc25a24	-0.957937	1.94253	0.0264104
	Mlxipl	-0.95301	1.93591	0.0186693
	Zfp608	-0.947371	1.92836	0.0264104
	Gnpda1	-0.946455	1.92713	0.0274698
	Ctdspl	-0.923673	1.89694	0.0489357
	Slc43a2	-0.91639	1.88739	0.025138
	Lpar6	-0.90527	1.8729	0.0347231
	Appl2	-0.877995	1.83782	0.0443037
	Aatk	-0.872089	1.83031	0.0478153
	Kctd9	-0.868038	1.82518	0.0483273
	Klhl5	-0.817295	1.7621	0.0323413
	Nceh1	-0.806739	1.74925	0.0347871
	Tmem87b	-0.765377	1.69981	0.0318024
	Gk5	-0.749356	1.68104	0.0377323
	Septin8	-0.747662	1.67907	0.0274065
	Tob2	-0.714396	1.6408	0.0338469
	Csgalnact2	-0.680692	1.60291	0.0383485
	Ipcef1	-0.677861	1.59977	0.0240883
	Lactb2	-0.668024	1.5889	0.0335747
	Slc9a9	-0.661572	1.58181	0.0323643
	Tmem64	-0.643458	1.56207	0.0371845
	Agl	-0.635177	1.55313	0.0319725
	Mfhas1	-0.613967	1.53046	0.047083
	Impdh1	-0.587689	1.50284	0.028617
